# Supplementary material
Source: PeerJ journal article supplement (doi:10.7717/peerj-cs.3619)
Supplement: Supplementary_File_3.docx [file Supplementary_File_3.docx]

All comparison tools were executed according to the best practice parameter settings recommended in their official documentation. Unless otherwise stated, default parameters were used to ensure fair and reproducible comparisons.

Table 1. Overview of CNV detection tools used in the experiments.

| Tools | Signals used | Language | Publish | Last update | URL |
| --- | --- | --- | --- | --- | --- |
| Manta | PEM | C++, Python | 2015.12 | 2019.07 | <https://github.com/Illumina/manta> |
| Matchclips2 | SR, PEM, RD | C, C++ | 2013.08 | 2014.10 | <https://github.com/yhwu/matchclips2> |
| RSICNV | RD | C, C++ | 2013 | 2013 | <https://github.com/yhwu/rsicnv/tree/master> |
| TARDIS | SR, RD, PEM | C | 2017.10 | 2023.08 | <https://github.com/BilkentCompGen/tardis> |
| SVision | RD，PEM | Python | 2022.09 | 2025.04 | <https://github.com/xjtu-omics/SVision> |

**Manta** is a structural variant detection tool primarily based on paired-end mapping (PEM) signals. In our experiments, Manta was run using the default configuration with standard paired-end settings, without additional parameter tuning.

**Matchclips2** integrates split-read (SR), paired-end mapping (PEM), and read-depth (RD) signals for structural variant detection. We used the default parameters as described in the original publication and the official repository.

**RSICNV** is an RD-based CNV detection tool. All parameters were set to their default values according to the official implementation, with no manual tuning applied.

**TARDIS** combines SR, RD, and PEM signals for CNV and SV detection. In our experiments, TARDIS was executed using the recommended settings provided in the official documentation, with default parameters for read-depth segmentation and breakpoint refinement.

**SVision** is a deep learning–based CNV detection tool that integrates RD and PEM information. We used the default pretrained model and followed the recommended parameter settings described in the official documentation.

The exact command lines used for each tool are available upon reasonable request.
