# Supplementary material
Source: PeerJ journal article supplement (doi:10.7717/peerj-cs.3619)
Supplement: Supplementary_File_4.docx [file Supplementary_File_4.docx]

We performed pairwise comparisons of F1-scores between SOSCNV and four benchmark tools on two simulated datasets derived from chromosomes 13 and 21. In both datasets, SOSCNV significantly outperformed all other tools (p<0.01 for all comparisons).

For the chromosome 13 dataset (Table 1B), the 95% confidence intervals indicate the largest difference with RSICNV (0.565–0.741) and smaller differences with Matchclips2 (0.038–0.269). Similarly, for the chromosome 21 dataset (Table 2B), SOSCNV exhibits the greatest improvement over RSICNV (95% CI: 0.172–0.600) and smaller, yet still significant, differences with Matchclips2 (0.040–0.300).

In Tables 1B and 2B, t_crit denotes the critical t-value used to calculate confidence intervals. The columns 95% CI (Lower) and 95% CI (Upper) indicate the lower and upper bounds of the 95% confidence interval for the corresponding estimates.

These results demonstrate that SOSCNV consistently outperforms benchmark tools across different simulated datasets, confirming the robustness of its detection performance.

Table 1(A) F1-score comparison of SOSCNV and competing tools on simulated datasets derived from chromosome 13 under different coverage and tumor purity settings.

|  | 10x-0.4 | 10x-0.6 | 10x-0.8 | 20x-0.4 | 20x-0.6 | 20x-0.8 | 30x-0.4 | 30x-0.6 | 30x-0.8 |
| --- | --- | --- | --- | --- | --- | --- | --- | --- | --- |
| SOSCNV | 0.746 | 0.770 | 0.794 | 0.755 | 0.754 | 0.812 | 0.762 | 0.754 | 0.773 |
| Manta | 0.678 | 0.672 | 0.615 | 0.699 | 0.619 | 0.593 | 0.678 | 0.590 | 0.582 |
| Matchclips2 | 0.350 | 0.697 | 0.381 | 0.753 | 0.697 | 0.610 | 0.754 | 0.680 | 0.614 |
| RSICNV | 0.271 | 0.284 | 0.247 | 0.054 | 0.054 | 0.047 | 0.030 | 0.030 | 0.028 |
| TARDIS | 0.707 | 0.661 | 0.620 | 0.621 | 0.606 | 0.603 | 0.604 | 0.604 | 0.606 |

Table 1(B) Statistical comparison of F1-scores between SOSCNV and competing tools (paired t-test, n = 9). P-values and confidence intervals were obtained from paired t-tests comparing SOSCNV with each competing tool across nine matched experimental conditions.

| Comparison | P-value | t_crit | 95% CI (Lower) | 95% CI (Upper) |
| --- | --- | --- | --- | --- |
| SOSCNV vs Manta | 0.00000064 | 2.306004 | 0.097562218 | 0.16726828 |
| SOSCNV vs Matchclips2 | 0.00791519 | 2.306004 | 0.038009788 | 0.269260359 |
| SOSCNV vs RSICNV | 0.00000000 | 2.306004 | 0.564637253 | 0.740589628 |
| SOSCNV vs TARDIS | 0.00000002 | 2.306004 | 0.115530164 | 0.170233008 |

Table 2(A) F1-score comparison of SOSCNV and competing tools on simulated datasets derived from chromosome 21 under different coverage and tumor purity settings.

|  | 10x-0.4 | 10x-0.6 | 10x-0.8 | 20x-0.4 | 20x-0.6 | 20x-0.8 | 30x-0.4 | 30x-0.6 | 30x-0.8 |
| --- | --- | --- | --- | --- | --- | --- | --- | --- | --- |
| SOSCNV | 0.843 | 0.820 | 0.780 | 0.829 | 0.773 | 0.751 | 0.826 | 0.759 | 0.747 |
| Manta | 0.719 | 0.692 | 0.613 | 0.731 | 0.630 | 0.613 | 0.705 | 0.616 | 0.600 |
| Matchclips2 | 0.418 | 0.414 | 0.413 | 0.819 | 0.736 | 0.642 | 0.816 | 0.715 | 0.627 |
| RSICNV | 0.741 | 0.784 | 0.770 | 0.323 | 0.330 | 0.261 | 0.159 | 0.160 | 0.129 |
| TARDIS | 0.793 | 0.700 | 0.646 | 0.669 | 0.645 | 0.633 | 0.643 | 0.643 | 0.626 |

Table 2(B) Statistical comparison of F1-scores between SOSCNV and competing tools (paired t-test, n = 9). P-values and confidence intervals were obtained from paired t-tests comparing SOSCNV with each competing tool across nine matched experimental conditions.

| Comparison | P-value | t_crit | 95% CI (Lower) | 95% CI (Upper) |
| --- | --- | --- | --- | --- |
| SOSCNV vs Manta | 0.00001230 | 2.306004 | 0.093637 | 0.17509 |
| SOSCNV vs Matchclips2 | 0.00934390 | 2.306004 | 0.040398 | 0.29951 |
| SOSCNV vs RSICNV | 0.00079637 | 2.306004 | 0.171988 | 0.599717 |
| SOSCNV vs TARDIS | 0.00002423 | 2.306004 | 0.085318 | 0.165747 |
